# Supplementary material for: A ratiometric theranostic system for visualization of ONOO− species and reduction of drug-induced hepatotoxicity
Source: Royal Society of Chemistry journal article supplement (doi:10.1039/d1bm01675j), 2021-12-27
Supplement: d1bm01675j1.pdf [file d1bm01675j1.pdf]

## *Supporting Information*

### **A Ratiometric Theranostic System for Visualization of ONOO<sup>-</sup> Species and Reduction of Drug-Induced Hepatotoxicity**

Joe H. C. Chau,<sup>‡a</sup> Ruoyao Zhang,<sup>‡b</sup> Michelle M. S. Lee,<sup>a</sup> Kristy W. K. Lam,<sup>a</sup> Eric Y. Yu,<sup>a</sup> Jacky W. Y. Lam,<sup>ad</sup> Ryan T. K. Kwok<sup>\*ad</sup> and Ben Zhong Tang<sup>\*acde</sup>

<sup>a</sup>Department of Chemical and Biological Engineering and Department of Chemistry, Hong Kong Branch of Chinese National Engineering Research Center for Tissue Restoration and Reconstruction, Division of Life Science and State Key Laboratory of Molecular Neuroscience, The Hong Kong University of Science and Technology, Clear Water Bay, Kowloon, Hong Kong, China.

<sup>b</sup>Institute of Engineering Medicine, Beijing Institute of Technology, Beijing 100811, China.

<sup>c</sup> Shenzhen Institute of Molecular Aggregate Science and Engineering, School of Science and Engineering, The Chinese University of Hong Kong, Shenzhen, 2001 Longxiang Boulevard, Longgang District, Shenzhen City, Guangdong 518172, China.

<sup>d</sup> HKUST Shenzhen Research Institute, No. 9 Yuexing 1st RD, South Area Hi-tech Park, Nanshan, Shenzhen 518057, China.

<sup>e</sup> State Key Laboratory of Luminescent Materials and Devices, and Center for Aggregation-Induced Emission (Guangzhou International Campus), South China University of Technology, Guangzhou 510640, China.

<sup>‡</sup> These authors contributed equally.

## Table of contents

|                                                                                                                          |     |
|--------------------------------------------------------------------------------------------------------------------------|-----|
| Materials and instrumentation                                                                                            | 3   |
| Generation of various RONS                                                                                               | 3   |
| Cell Culture and Staining                                                                                                | 3-4 |
| Drug Treatment                                                                                                           | 4   |
| Intracellular RONS Evaluation                                                                                            | 4   |
| Cell Viability                                                                                                           | 4   |
| Synthesis of AIEgens                                                                                                     | 5-6 |
| <b>Figure S1.</b> Mass spectrum of <b>1</b>                                                                              | 6   |
| <b>Figure S2.</b> <sup>1</sup> H NMR spectrum of <b>1</b> in CDCl <sub>3</sub>                                           | 7   |
| <b>Figure S3.</b> <sup>13</sup> C NMR spectrum of <b>1</b> in CDCl <sub>3</sub>                                          | 7   |
| <b>Figure S4.</b> Mass spectrum of ATV-Py ( <b>2</b> )                                                                   | 8   |
| <b>Figure S5.</b> <sup>1</sup> H NMR spectrum of ATV-Py ( <b>2</b> ) in CDCl <sub>3</sub>                                | 8   |
| <b>Figure S6.</b> <sup>13</sup> C NMR spectrum of ATV-Py ( <b>2</b> ) in CDCl <sub>3</sub>                               | 9   |
| <b>Figure S7.</b> Mass spectrum of ATV-PPB ( <b>3</b> )                                                                  | 9   |
| <b>Figure S8.</b> <sup>1</sup> H NMR spectrum of ATV-PPB ( <b>3</b> ) in CDCl <sub>3</sub>                               | 10  |
| <b>Figure S9.</b> <sup>13</sup> C NMR spectrum of ATV-PPB ( <b>3</b> ) in CDCl <sub>3</sub>                              | 10  |
| <b>Scheme S2.</b> The proposed reaction mechanism of ATV-PPB towards ONOO <sup>-</sup>                                   | 11  |
| <b>Figure S10.</b> PL spectra of 10 μM ATV-PPB in PBS buffer with different concentrations of ONOO <sup>-</sup>          | 11  |
| <b>Figure S11.</b> Plot of PL intensity ratio ( $I_{500}/I_{625}$ ) as a function of ONOO <sup>-</sup> concentration     | 11  |
| <b>Figure S12.</b> Absorption spectra of ATV-PPB with or without addition of ONOO <sup>-</sup> in PBS buffer             | 12  |
| <b>Figure S13.</b> Hydrodynamic size distribution of ATV-PPB in 10% DMSO of DMSO/H <sub>2</sub> O mixture.               | 12  |
| <b>Figure S14.</b> Time tracking of ATV-PPB-stained HepG2 cells from 0.5 h to 8 h.                                       | 13  |
| <b>Figure S15.</b> Co-staining experiment of ATV-PPB with MTDR and BODIPY under APAP pretreatment                        | 13  |
| <b>Figure S16.</b> Mass spectrum of the reaction product (10 μM ATV-PPB and 400 μM ONOO <sup>-</sup> reacted for 30 min) | 14  |

## Materials and instrumentation

Chemicals for the synthesis were purchased from Sigma-Aldrich, J&K chemistry and Meryer as received without further purification. Bioreagents for cell culture and imaging were purchased from Thermo Fisher Scientific and Sigma-Aldrich.  $^1\text{H}$  NMR and  $^{13}\text{C}$  NMR spectra were measured by the Bruker ARX 400 NMR spectrometer. High resolution mass spectra (HRMS) were measured by GCT premier CAB048 mass spectrometer operating in the MALDI-TOF mode. UV-Vis absorption spectra were measured on PerkinElmer Lambda 365 Spectrophotometer. Photoluminescence (PL) spectra were measured by Edinburgh FLS980 Spectrofluorometer. Particle size and distribution of AIE aggregates were measured by Zeta Potential Analyzer (ZetaPALS, Brookhaven Instruments). Fluorescent images of cells were captured by Confocal Microscopy (Zesis, LSM 800). Flow cytometry was conducted by Becton Dickinson FACS Aria IIIu Cell Sorter & Analyzer.

## Generation of various RONS

The different RONS were generated according to the literature.<sup>[1]</sup>

- i.  $\text{ONOO}^-$ : Two freshly prepared mixture solutions, including the mixture of hydrogen peroxide (0.7 M, 150  $\mu\text{L}$ ) and hydrochloric acid (0.6 M, 150  $\mu\text{L}$ ), and mixture of sodium nitrite (0.6 M, 300  $\mu\text{L}$ ) and sodium hydroxide (1.5 M, 300  $\mu\text{L}$ ), were mixed simultaneously to generate  $\text{ONOO}^-$  stock solution (2 mM). The concentration of the  $\text{ONOO}^-$  stock solution was determined according to the molar extinction coefficient of 1670  $\text{M}^{-1}\text{cm}^{-1}$  by measuring the absorbance at 302 nm in 0.1 M sodium hydroxide.
- ii.  $\text{H}_2\text{O}_2$ : Stock solution of  $\text{H}_2\text{O}_2$  (30%) is commercially available.
- iii.  $\bullet\text{OH}$ :  $\bullet\text{OH}$  was generated by Fenton reaction. 20 mg of ferrous chloride was added into the solution of 10 equiv of  $\text{H}_2\text{O}_2$ . The concentration of  $\bullet\text{OH}$  was supposed to be equal to that of  $\text{Fe}^{2+}$ .
- iv.  $\text{ClO}^-$ : Sodium hypochlorite (13% active chlorine basis) is commercially available.
- v.  $\bullet\text{O}_2^-$ ;  $\bullet\text{O}_2^-$  was sourced from potassium superoxide, 2 mM stock solution was prepared in DMSO.

## Cell Culture and Staining

Cell culture: HepG2 cells were cultured in Dulbecco's modified Eagle's medium (DMEM) containing 10% fetal bovine serum (FBS) and 1 % penicillin-streptomycin in a 5%  $\text{CO}_2$  humidified incubator at 37  $^\circ\text{C}$ .

Cell staining experiment: ATV-Py/ATV-PPB was dissolved in DMSO at stock concentration of 1 mM. The cultured HepG2 cells were seeded on a glass coverslip at density of  $1.2 \times 10^5$  cells  $\text{mL}^{-1}$  and further cultured for 48 h. Then, the HepG2 cells were incubated with 10  $\mu\text{M}$  ATV-Py for 30 min / 10  $\mu\text{M}$  ATV-PPB for 8 h.

Co-staining experiment: MitoTracker Deep Red (MTDR) and BODIPY Green were dissolved in DMSO at stock concentration of 0.1 mM and 1 mM, respectively. HepG2 cells were firstly incubated with 10  $\mu$ M ATV-PPB for 8 h followed by staining with 0.2  $\mu$ M MTDR for 20 min. On the other hand, HepG2 cells were co-stained with 0.2  $\mu$ M BODIPY Green and ATV-Py for 30 min.

### **Drug Treatment**

Drug treatment experiment: Acetaminophen (APAP) was dissolved in DMSO at stock concentration of 2 M. HepG2 cells were pre-treated with different concentrations of APAP (1 mM, 5 mM and 10 mM) for 16 h and then co-incubated with ATV-PPB for another 8 h. Only for the time tracking experiment, HepG2 cells were incubated with 10 mM APAP and 10  $\mu$ M ATV-Py at the same time.

### **Intracellular RONS Evaluation**

Evaluation of intracellular ROS experiment: DCFH-DA was dissolved in DMSO at stock concentration of 10 mM. HepG2 cells were pre-treated with different concentration of APAP for 16 h and then co-incubated with ATV-PPB for another 8 h. After that 80  $\mu$ M DCFH-DA was introduced to the cells for staining 30 min.

### **Cell Viability**

HepG2 cells were seeded into 96-well plates at density of  $8 \times 10^3$  to  $1 \times 10^4$  cells per well and cultured for 24 h. ATV-Py and ATV-PPB were dissolved in DMEM at different concentrations (0, 1, 2, 4, 8, 10, 12, 14, 18 and 20  $\mu$ M). Then, the DMEM/dye solutions were added into the wells as the treatment groups (100  $\mu$ L per well) followed by 24 h incubation. After that, 10  $\mu$ L freshly prepared MTT solution (5 mg  $\text{mL}^{-1}$  in PBS) was added into each well with additional 4 h incubation. Subsequently, MTT solution was carefully discarded and 100  $\mu$ L DMSO was added to dissolve the purple crystals with 15 min incubation. The absorbance of MTT at 540 nm was measured by microplate reader (Varioskan LUX, Thermo Scientific). The experiment was repeated for three times.

### **Flow Cytometry**

HepG2 cells were seeded in 6-well plates at density of  $4 \times 10^4$  cells per well and cultured for 48 h. HepG2 cells were pre-treated with different concentrations of APAP (1 mM, 5 mM and 10 mM) for 16 h and then co-incubated with ATV-PPB for another 8 h., HepG2 cells were pre-treated with different concentrations of APAP (1 mM, 5 mM and 10 mM) for 24 h and 10  $\mu$ M ATV-PPB was added at 16 h for 8 h staining. The fluorescence signals were measured by flow cytometry and collected from DAPI and PerCP-Cy5-5 channel.

## Synthesis of AIEgens

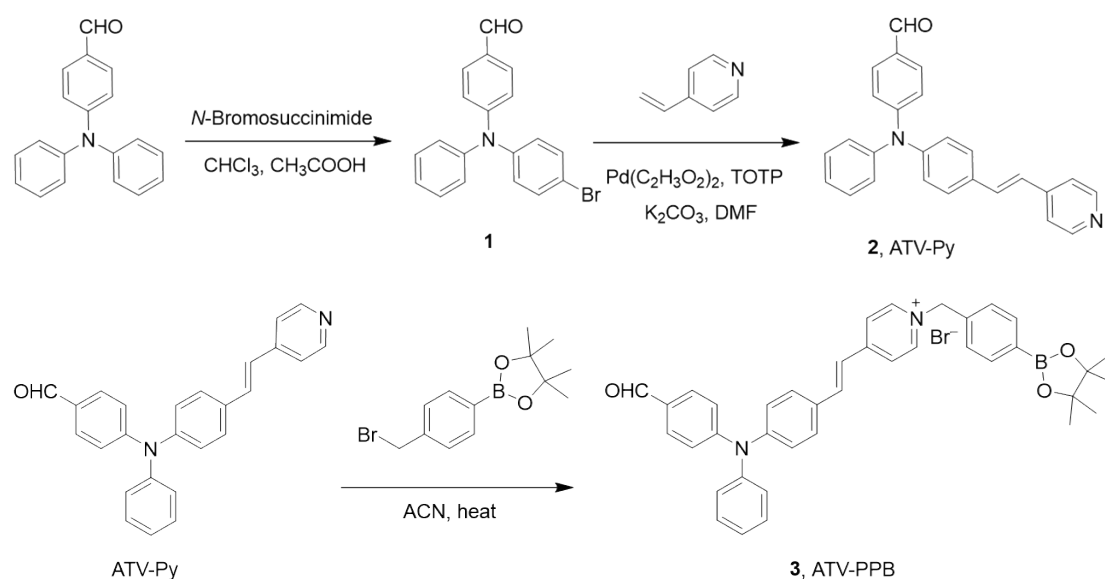

**Scheme S1.** The synthetic route of ATV-Py and ATV-PPB.

**Synthesis of 4-(4-bromophenyl)(phenylamino)benzaldehyde (1):** Into a 20 mL one-neck round-bottom flask, 4-(diphenylamino)benzaldehyde (2.71 g, 10 mmol) and *N*-bromosuccinimide (1.775 g, 10 mmol) were dissolved in chloroform (5 mL) with acetic acid (5 mL). The mixture was then stirred in room temperature. After 24 h reaction, the reaction mixture was extracted with DCM and  $\text{H}_2\text{O}$ , organic layer was collected and dried over by  $\text{MgSO}_4$  and concentrated by evaporation. The crude product was purified by silica gel chromatography with hexane/ethyl acetate (4:1 v/v) to obtain **1** as white powder (2.04 g, 57.9 %).  $^1\text{H}$  NMR (400 MHz,  $\text{CDCl}_3$ )  $\delta$  9.81 (s, 1H), 7.72–7.66 (m, 2H), 7.45–7.41 (m, 2H), 7.36–7.32 (m, 2H), 7.20–7.14 (m, 3H), 7.05–7.02 (m, 4H).  $^{13}\text{C}$  NMR (400 MHz,  $\text{CDCl}_3$ )  $\delta$  190.5, 152.9, 145.9, 145.4, 133.0, 132.9, 131.5, 131.4, 130.0, 129.8, 129.7, 127.5, 126.4, 126.3, 125.5, 125.2, 120.5, 120.0, 119.4, 117.8. HRMS (MALDI-TOF,  $m/z$ ):  $[\text{M}]^+$  calcd for  $\text{C}_{19}\text{H}_{14}\text{BrNO}$  352.2310, found 352.0323.

**Synthesis of (*E*)-4-(phenyl(4-(2-(pyridine-4-yl)vinyl)phenyl)amino)benzaldehyde (2 or ATV-Py):** Into a 50 mL two-neck round-bottom flask, **1** (1.098 g, 3 mmol), 4-vinylpyridine (0.644 mL, 6 mmol), palladium(II) acetate (0.067 g, 0.3 mmol), tris-*o*-tolylphosphine (0.2739 g, 0.9 mmol) and potassium carbonate (2.902 g, 21 mmol) were dissolved in DMF (20 mL) under  $\text{N}_2$ . The mixture was heated to 150 °C and stirred overnight. After 24 h reaction, the reaction mixture was cooled down to room temperature and extracted with DCM for three times. All the organic layers were collected and dried over by  $\text{MgSO}_4$  and concentrated by evaporation. The crude product was purified by silica gel chromatography with hexane/ethyl acetate (1:1 v/v) to obtain ATV-Py (**2**) as yellow powder (0.785 g, 67.0 %).  $^1\text{H}$  NMR (400 MHz,  $\text{CDCl}_3$ )  $\delta$  9.85 (s, 1H), 8.59 (s, 2H), 7.72 (d, 2H), 7.50 (d, 2H), 7.40–7.36 (m, 4H), 7.33–7.27 (m, 1H), 7.20 (m, 5H), 7.10 (d, 2H), 6.99–6.95 (m, 1H).  $^{13}\text{C}$  NMR (400 MHz,  $\text{CDCl}_3$ )  $\delta$  190.5, 152.9, 150.3, 146.7, 146.0, 144.7, 132.5, 132.3, 131.4, 130.0, 129.9, 128.4, 126.5, 125.6, 125.5, 120.5. HRMS (MALDI-TOF,  $m/z$ ):  $[\text{M}]^+$  calcd for  $\text{C}_{26}\text{H}_{20}\text{N}_2\text{O}$  376.1580, found 377.1653.

**Synthesis of (*E*)-4-(4-((4-formylphenyl)(phenyl)amino)styryl)-1-(4-(4,4,5,5-tetramethyl-1,3,2-dioxaborolan-2-yl)benzyl)pyridine-1-ium bromide (3 or ATV-PPB):** Into a 20 mL one-neck round-bottom flask **2** (0.391 g, 1 mmol) and 4-bromomethylphenylboronic acid pinacol ester (0.297 g, 1 mmol) were dissolved in acetonitrile (10 mL). The mixture was heated to 100 °C and stirred. After 24 h reaction, the reaction mixture was cooled down to room temperature and concentrated. The crude product was purified by silica gel chromatography with ethyl acetate/methanol (5:1 v/v) to obtain ATV-PPB (**3**) as red powder (0.368 g, 62.0 %). <sup>1</sup>H NMR (400 MHz, CDCl<sub>3</sub>) δ 9.83 (s, 1H), 9.07–9.06 (m, 2H), 7.94 (d, 2H), 7.77 (d, 2H), 7.72–7.70 (m, 2H), 7.65 (m, 1H), 7.57–7.55 (m, 2H), 7.52–7.50 (m, 1H), 7.36–7.32 (m, 2H), 7.22–7.18 (m, 1H), 7.13–7.11 (m, 2H), 7.11–7.10 (m, 3H), 7.10–7.08 (m, 1H), 7.01 (m, 1H), 6.01 (s, 2H), 1.29 (s, 12H). <sup>13</sup>C NMR (400 MHz, CDCl<sub>3</sub>) δ 190.7, 152.4, 145.7, 144.1, 141.6, 136.0, 131.4, 130.7, 130.2, 130.0, 128.6, 126.9, 126.1, 124.3, 123.9, 121.8, 121.0, 84.2, 63.4, 25.0. HRMS (MALDI-TOF, *m/z*): [M]<sup>+</sup> calcd for C<sub>39</sub>H<sub>38</sub>BN<sub>2</sub>O<sub>3</sub> 593.2980, found 593.2973.

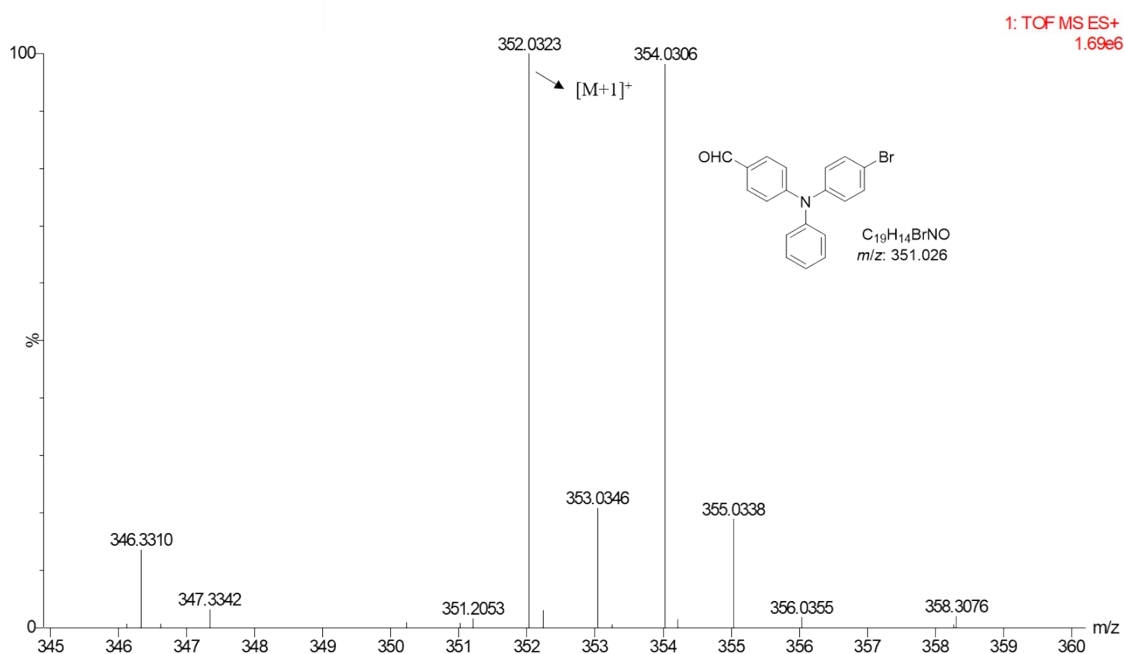

**Figure S1.** Mass spectrum of **1**.

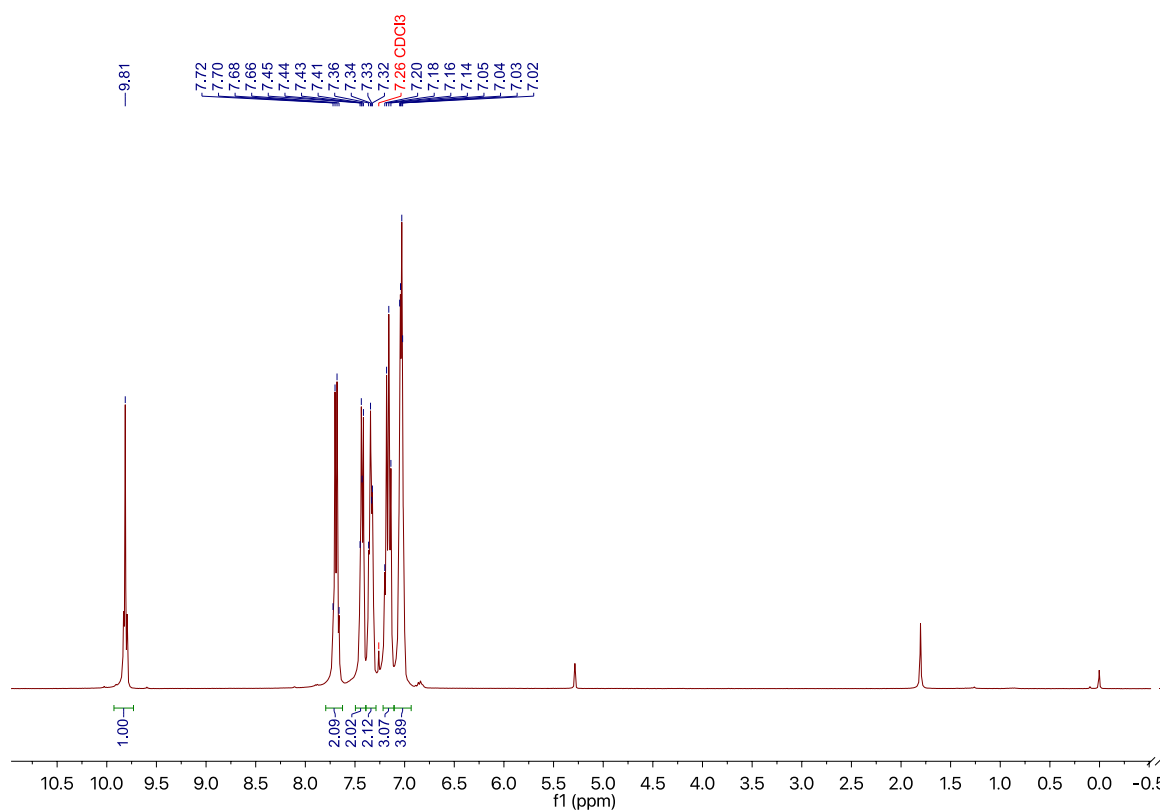

Figure S2.  $^1\text{H}$  NMR spectrum of **1** in  $\text{CDCl}_3$ .

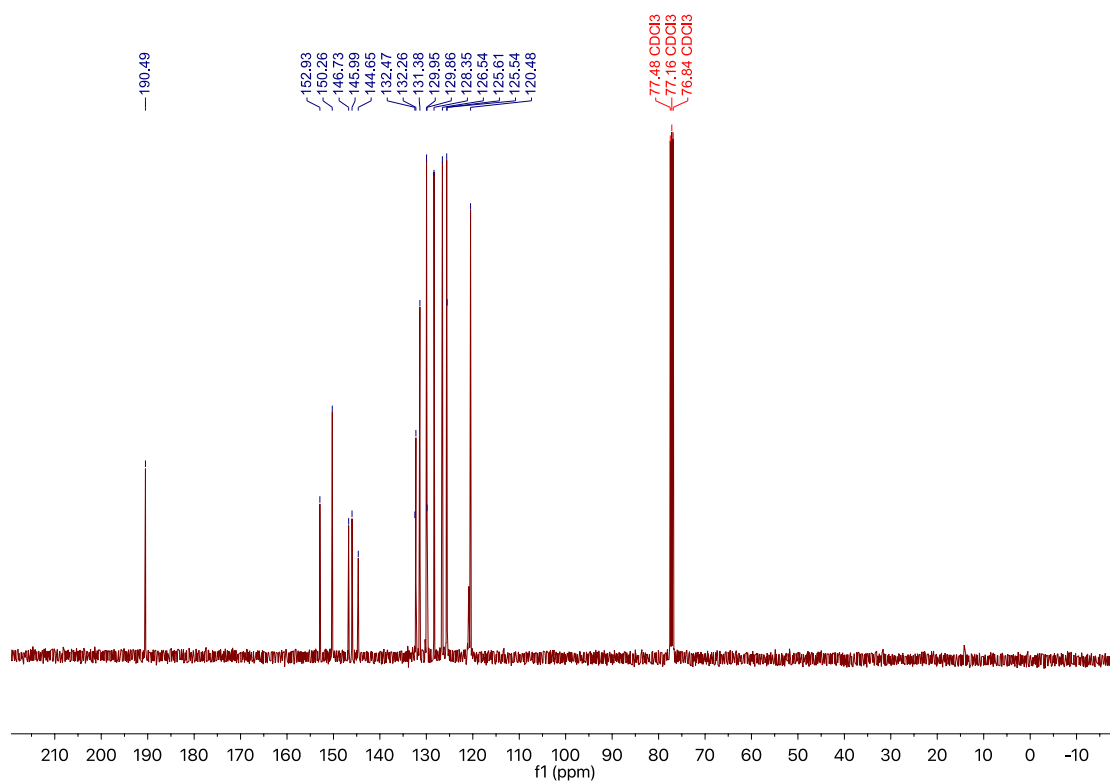

Figure S3.  $^{13}\text{C}$  NMR spectrum of **1** in  $\text{CDCl}_3$ .

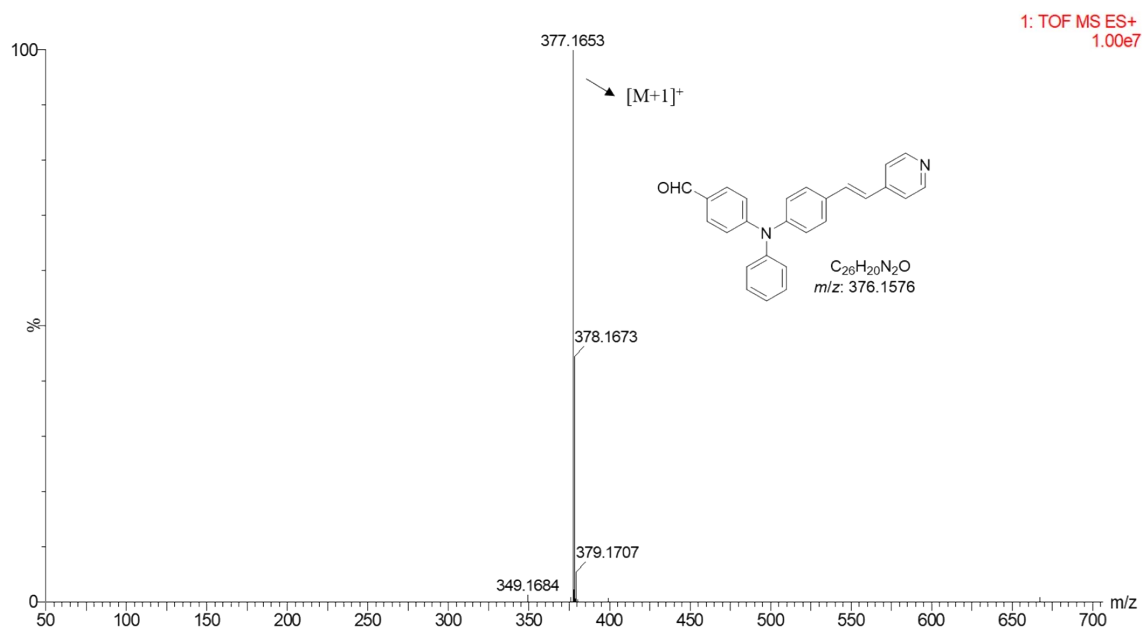

Figure S4. Mass spectrum of ATV-Py (2).

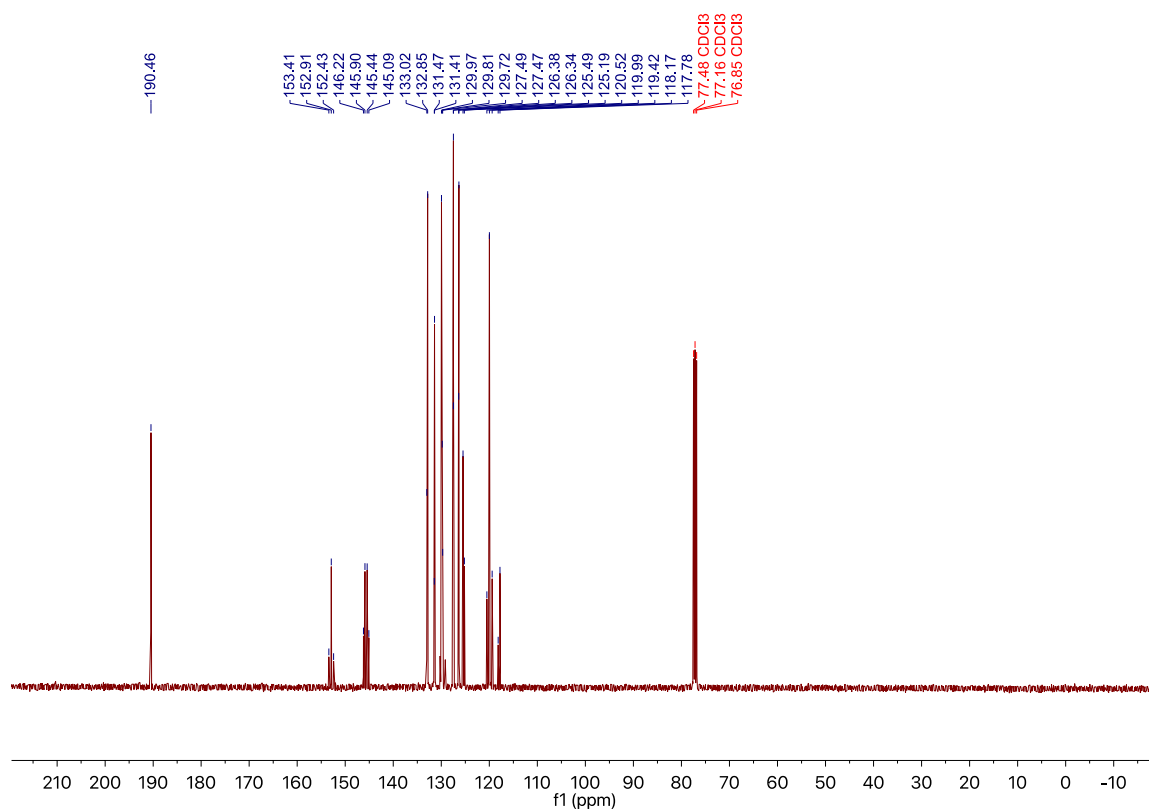

Figure S5. <sup>1</sup>H NMR spectrum of ATV-Py (2) in CDCl<sub>3</sub>.



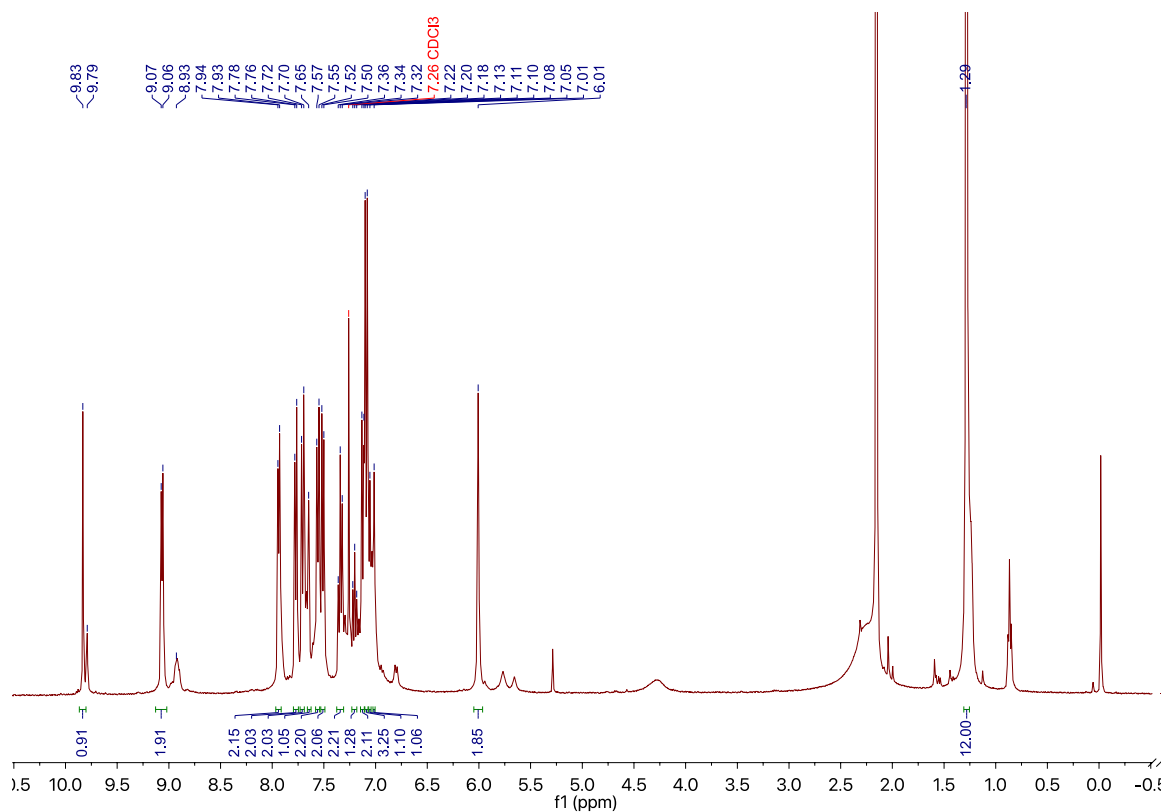

**Figure S6.**  $^{13}\text{C}$  NMR spectrum of ATV-Py (**2**) in  $\text{CDCl}_3$ .

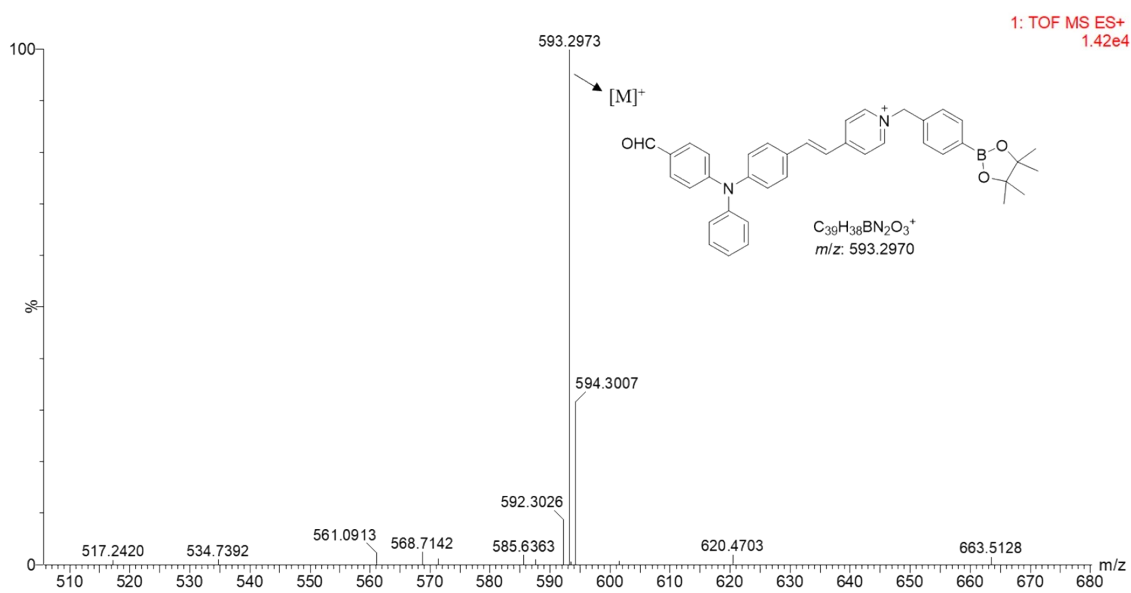

**Figure S7.** Mass spectrum of ATV-PPB (**3**).

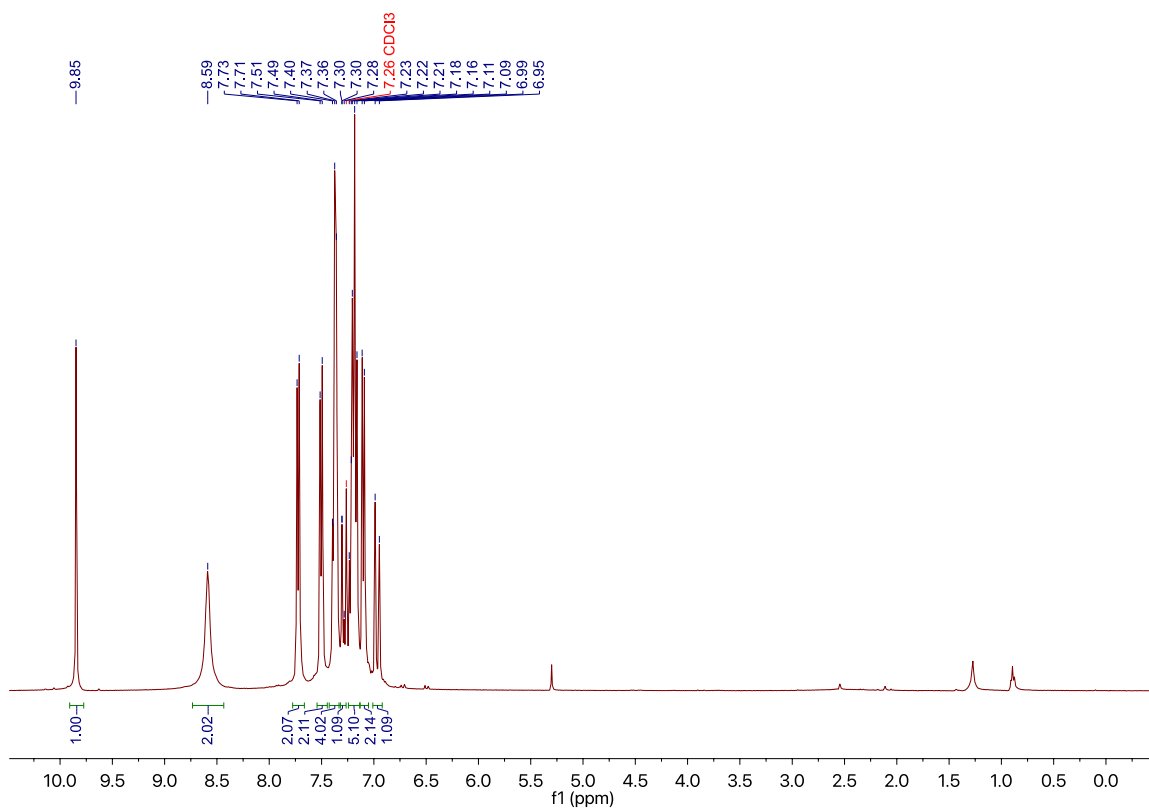

Figure S8.  $^1\text{H}$  NMR spectrum of ATV-PPB (**3**) in  $\text{CDCl}_3$ .

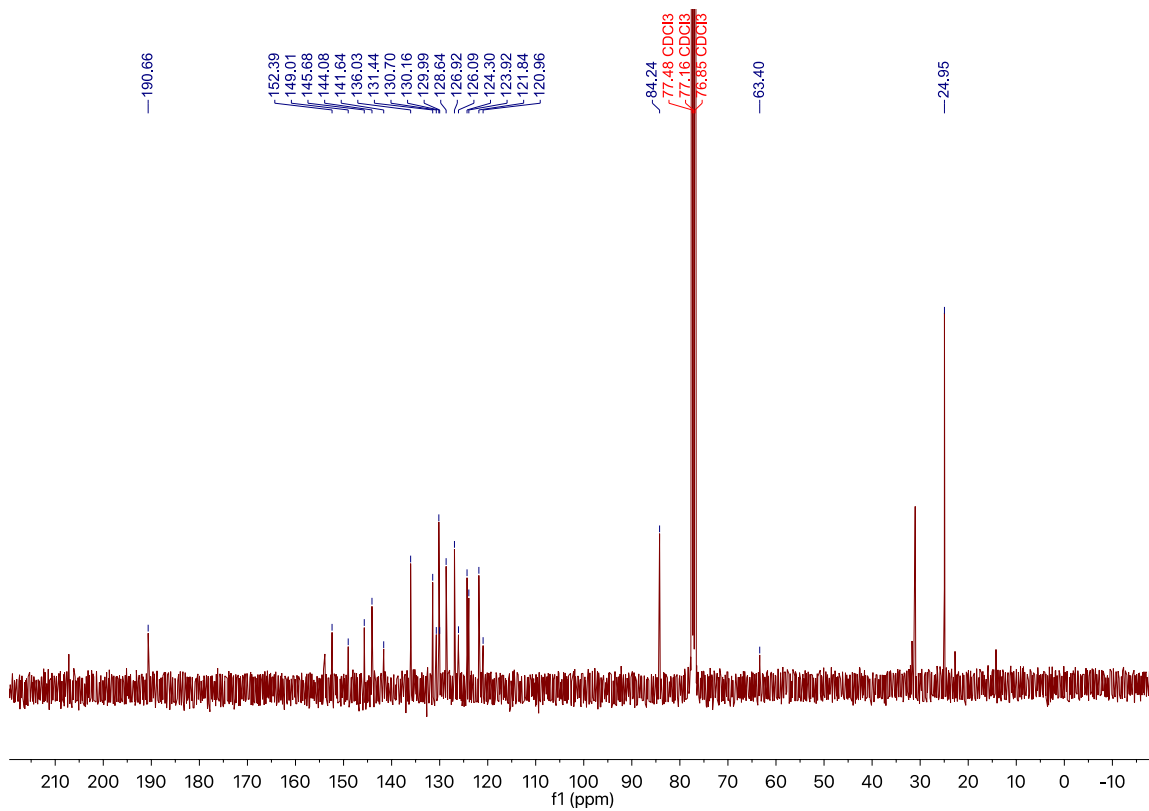

Figure S9.  $^{13}\text{C}$  NMR spectrum of ATV-PPB (**3**) in  $\text{CDCl}_3$ .

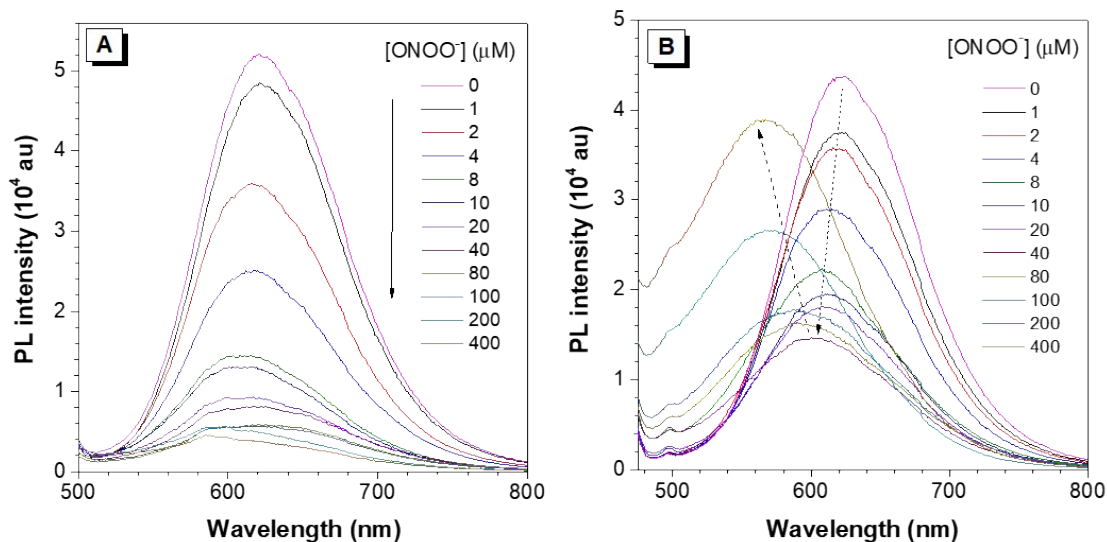

**Figure S10.** PL spectra of 10  $\mu\text{M}$  ATV-PPB in PBS buffer with different concentrations of  $\text{ONOO}^-$  under light excitation of (A) 488 nm and (B) 405 nm.

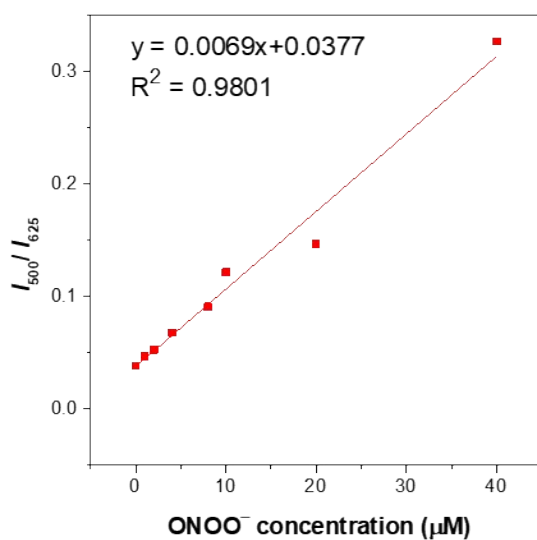

**Figure S11.** Plot of PL intensity ratio ( $I_{500}/I_{625}$ ) as a function of  $\text{ONOO}^-$  concentration.

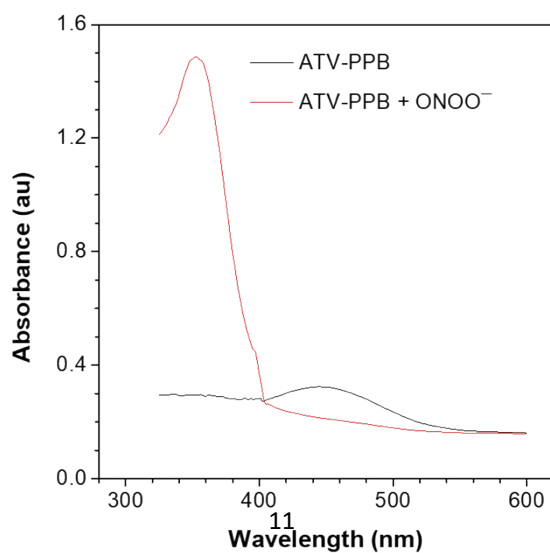

**Figure S12.** Absorption spectra of 10  $\mu\text{M}$  ATV-PPB (red) with or (black) without addition of 400  $\mu\text{M}$  ONOO<sup>-</sup> in PBS buffer.

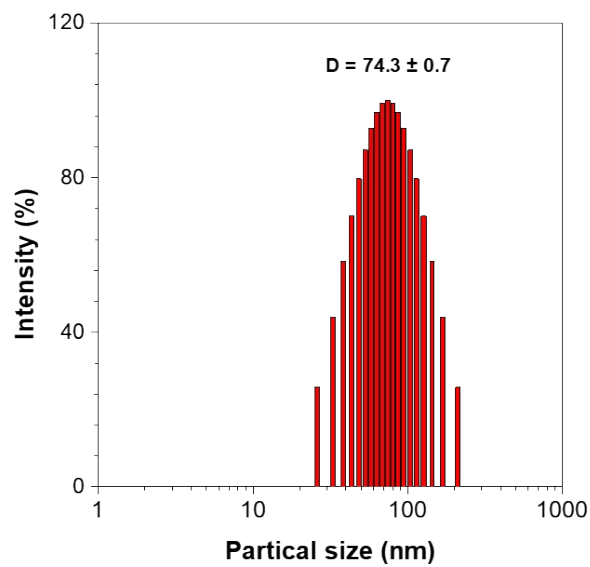

**Figure S13.** Hydrodynamic size distribution of ATV-PPB in 10% DMSO of DMSO/H<sub>2</sub>O mixture. D represented as mean  $\pm$  S.D. ( $n = 6$ ).

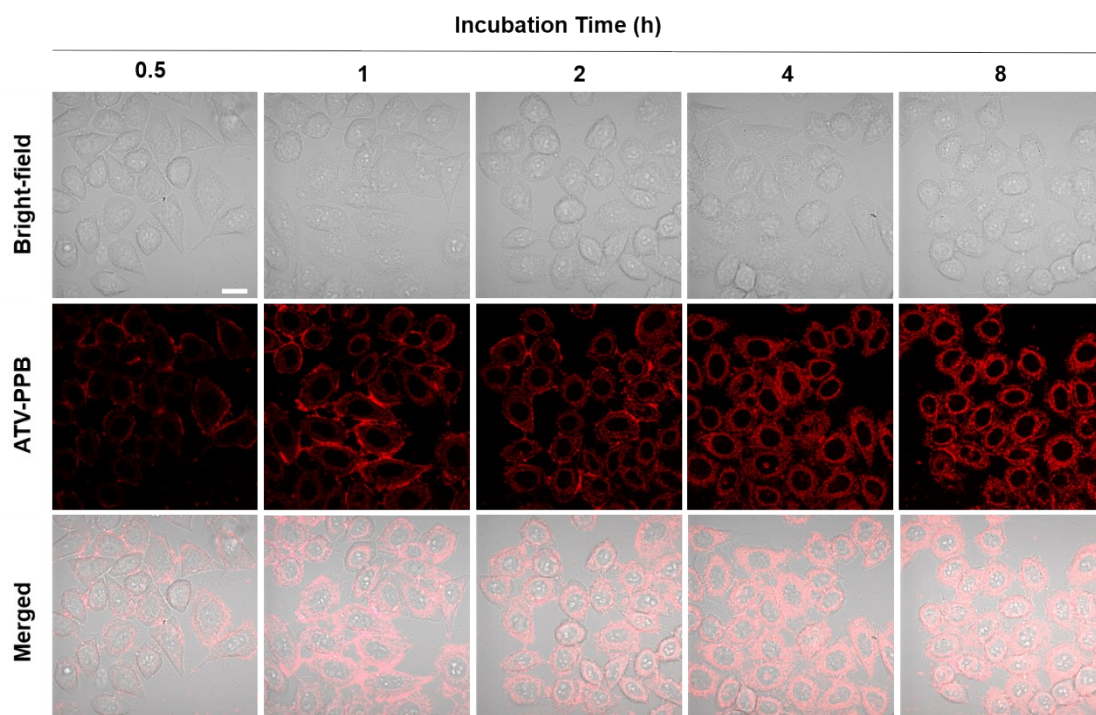

**Figure S14.** Time tracking of ATV-PPB-stained HepG2 cells from 0.5 h to 8 h. ATV-PPB concentration = 10 mM;  $\lambda_{\text{ex}}$  = 488 nm;  $\lambda_{\text{em}}$  = 600-700 nm. Scale bar: 20  $\mu\text{m}$ .

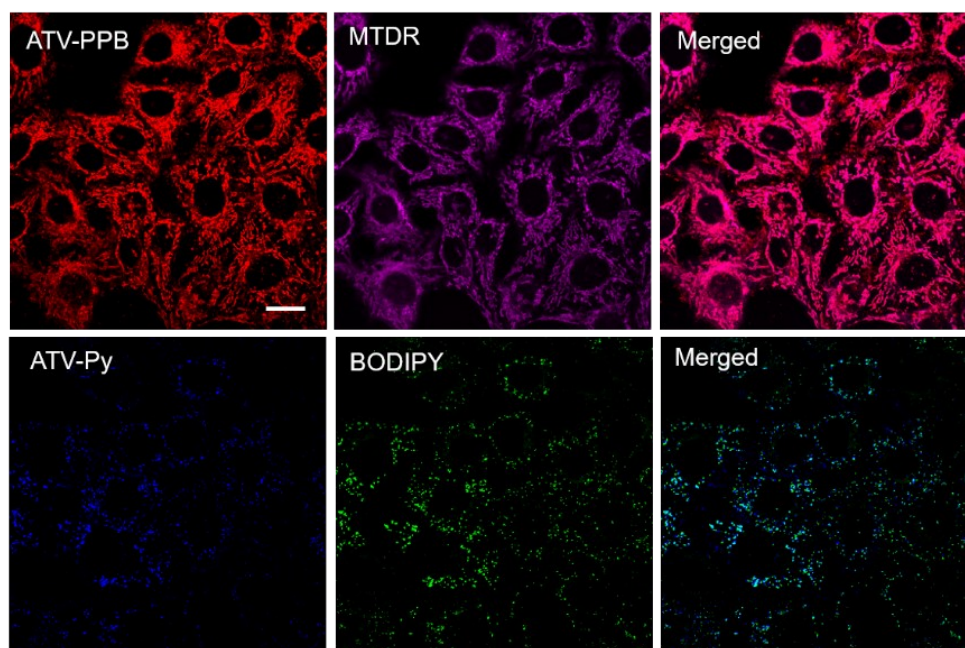

**Figure S15.** CLSM images of HepG2 cells were first treated with 10 mM APAP for 16 h and then stained with 10  $\mu\text{M}$  ATV-PPB for another 8 h followed by staining with 0.2  $\mu\text{M}$  MTDR/ 0.2  $\mu\text{M}$  BODIPY493/503 Green for next 30 min. ATV-PPB:  $\lambda_{\text{ex}}$  = 488 nm,  $\lambda_{\text{em}}$  = 600-700 nm; ATV-Py:  $\lambda_{\text{ex}}$  = 405 nm,  $\lambda_{\text{em}}$  = 450-600 nm; MTDR:  $\lambda_{\text{ex}}$  = 561 nm,  $\lambda_{\text{em}}$  = 600-700 nm; BODIPY493/503 Green:  $\lambda_{\text{ex}}$  = 488 nm,  $\lambda_{\text{em}}$  = 500-550 nm. Scale bar: 20  $\mu\text{m}$ .

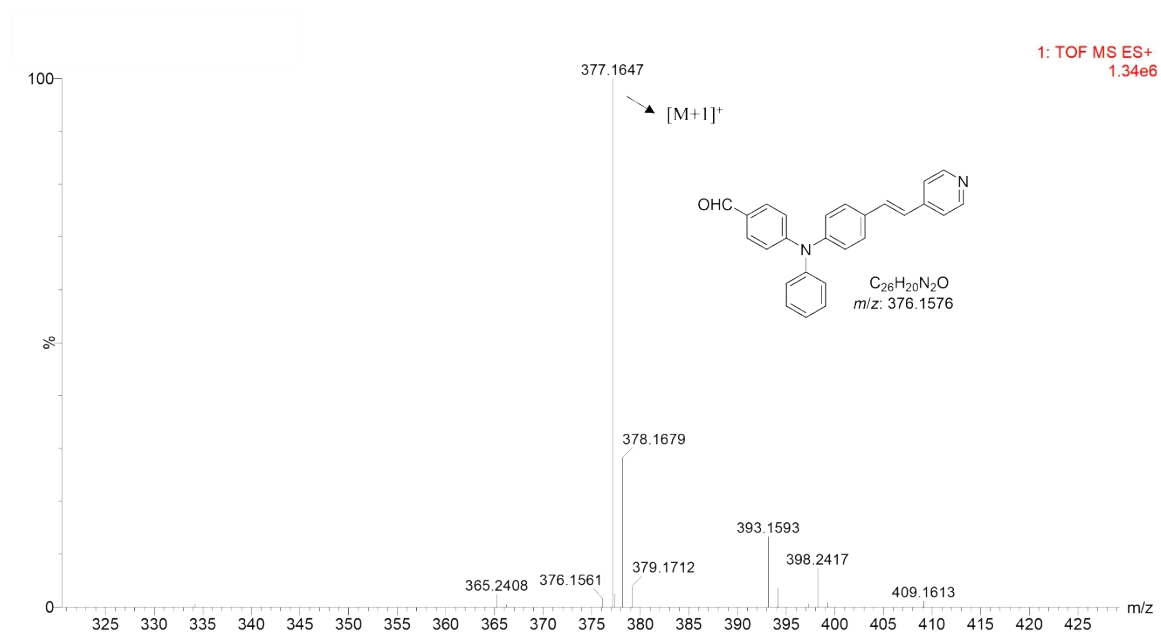

**Figure S16.** Mass spectrum of the reaction product (10  $\mu$ M ATV-PPB and 400  $\mu$ M ONOO<sup>-</sup> reacted for 30 min).
